# Supplementary material for: Stable and self-healing perovskite for high-speed underwater optical wireless communication
Source: Royal Society of Chemistry journal article supplement (doi:10.1039/d3tc04809h), 2024-01-01
Supplement: d3tc04809h1.pdf [file d3tc04809h1.pdf]

## Support Information

### Stable and self-healing perovskite for high-speed underwater optical wireless communication

Xiangyu Xu<sup>a,b</sup>, Yuxuan Fu<sup>a,b</sup>, Zhongren Shi<sup>a,c</sup>, Chao Li<sup>d</sup>, Yan Kuai<sup>a,c</sup>, Zhijia Hu<sup>a,b,c</sup>, Zhigang Cao<sup>\*a,b,c</sup>, Siqu Li<sup>\*a,b,c</sup>

- Information Materials and Intelligent Sensing Laboratory of Anhui Province, Anhui University, Hefei, 230601, Anhui, P. R. China.
- School of Physics and Optoelectronic Engineering, Anhui University, Hefei, 230601, Anhui, P. R. China.
- Key Laboratory of Opto-Electronic Information Acquisition and Manipulation of Ministry of Education, Anhui University, Hefei, 230601, Anhui, P. R. China
- Peng Cheng Laboratory, Shenzhen 518055, P. R. China

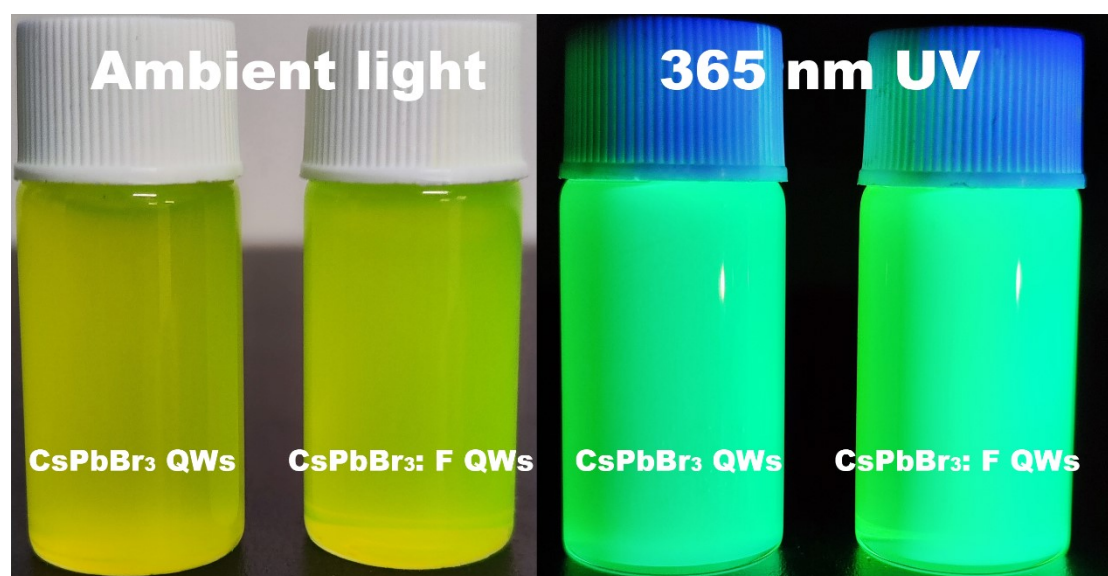

**Figure S1** Photographs of CsPbBr<sub>3</sub>:F QWs and CsPbBr<sub>3</sub> QWs solutions in toluene under ambient light and 365 nm UV light.

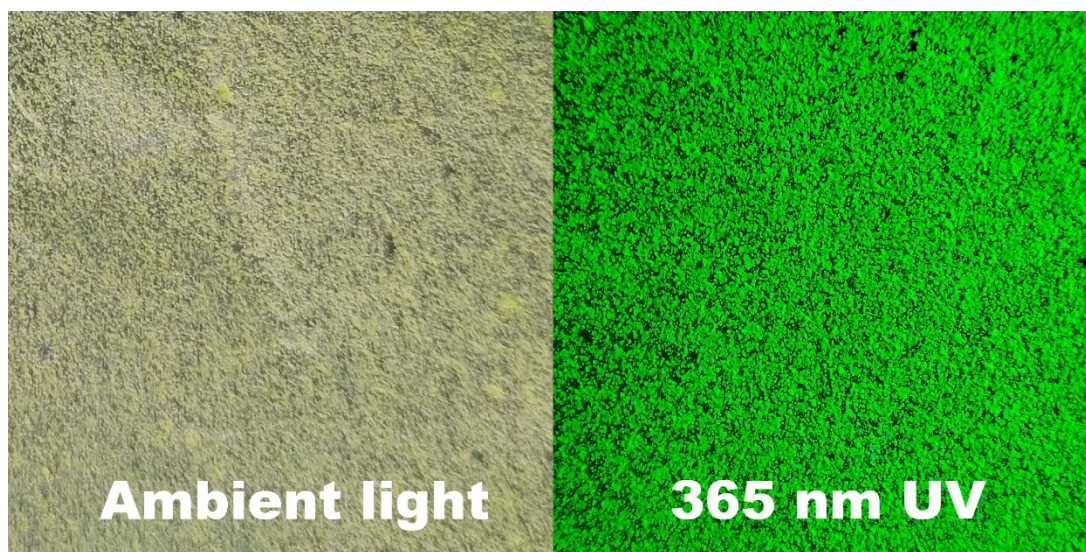

**Figure S2** Photographs of electrospun CsPbBr<sub>3</sub>: F QWs -SEBS fiber under ambient light and 365 nm UV light.

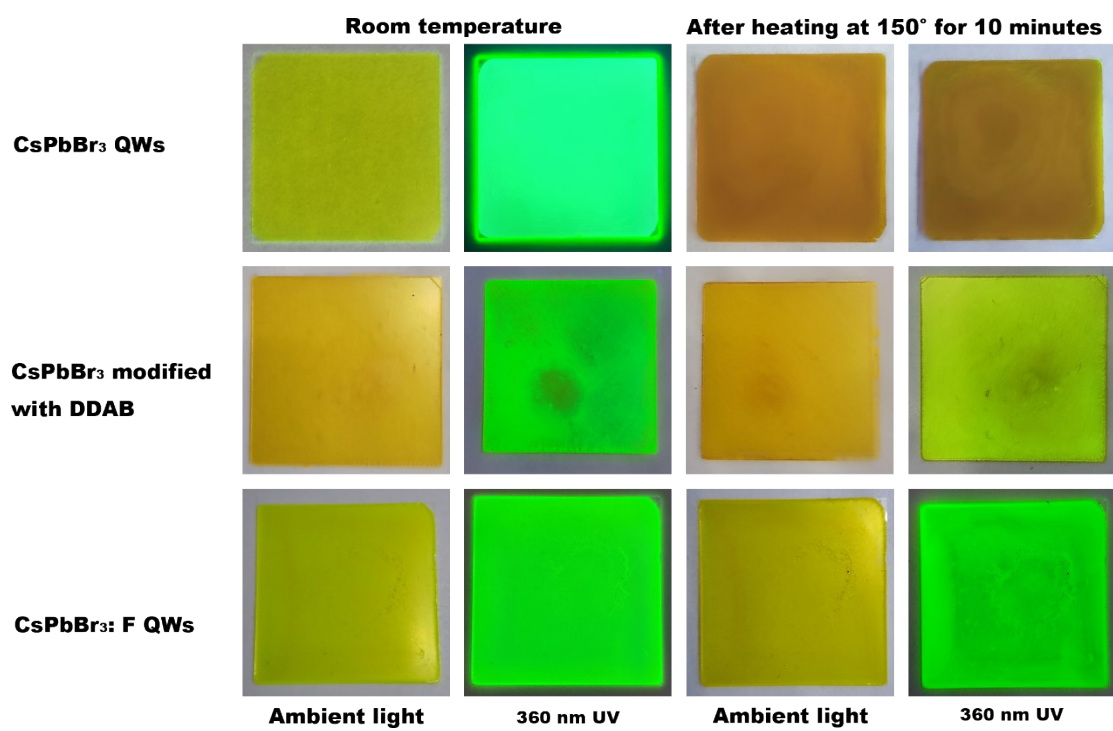

**Figure S3** Photographs of CsPbBr<sub>3</sub>:F QWs, CsPbBr<sub>3</sub> QWs, and CsPbBr<sub>3</sub> modified with DDAB after heating to 150°C for 10 minutes under 365 nm UV light and natural light.

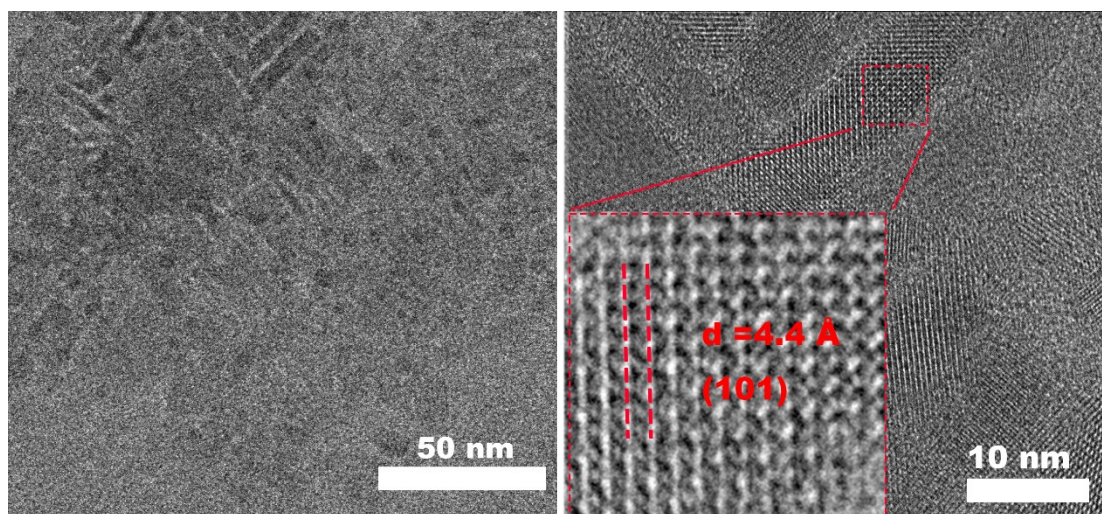

**Figure S4** TEM and HRTEM images of CsPbBr<sub>3</sub> QWs. CsPbBr<sub>3</sub> QW displays lattice fringes with an interplanar spacing of 4.4 Å, corresponding to the (101) lattice plane.

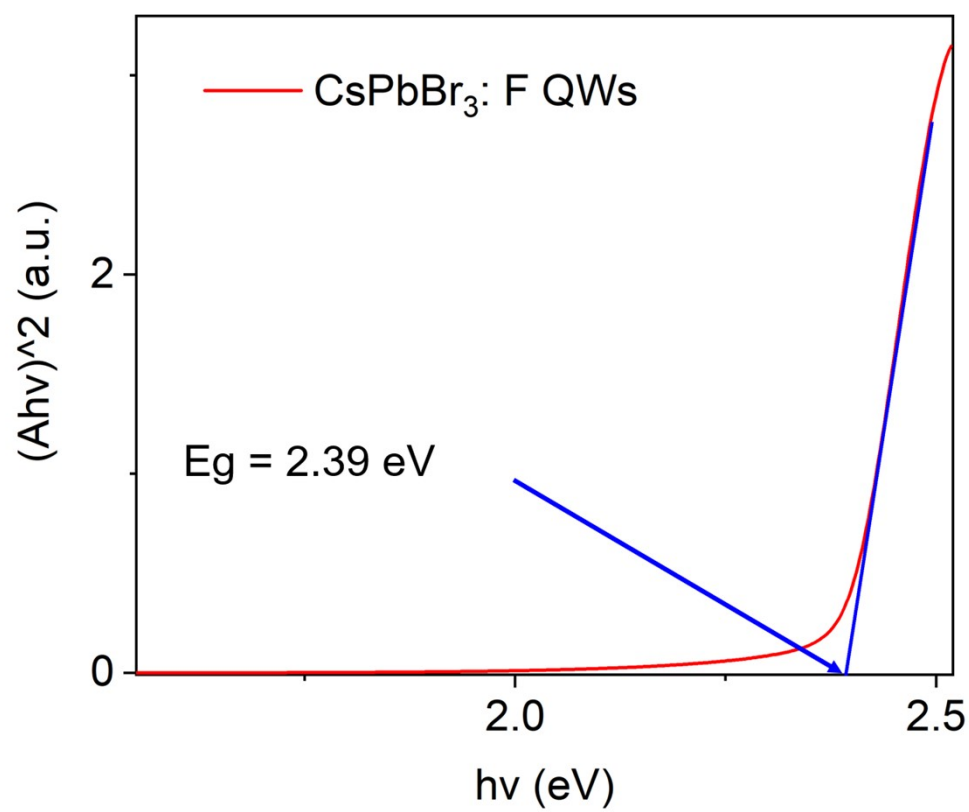

**Figure S5** Kubelka-Munk plots of CsPbBr<sub>3</sub>:F QWs.

**Table S1** Fitting parameters of CsPbBr<sub>3</sub>:F QWs and CsPbBr<sub>3</sub> QWs.

| <b>Sample</b>                    | <b><math>\tau_1</math> (ns)</b> | <b><math>\tau_2</math> (ns)</b> | <b>A<sub>1</sub></b> | <b>A<sub>2</sub></b> | <b><math>\tau_{avg}</math> (ns)</b> |
|----------------------------------|---------------------------------|---------------------------------|----------------------|----------------------|-------------------------------------|
| <b>QWs</b>                       | 65.38                           | 8.35                            | 0.25                 | 0.75                 | 49.55                               |
| <b>CsPbBr<sub>3</sub>: F QWs</b> | 58.28                           | 5.76                            | 0.48                 | 0.52                 | 53.20                               |

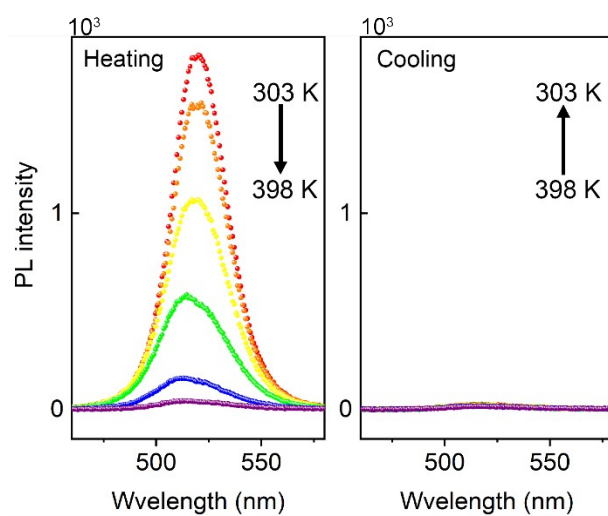

**Figure S6** The PL intensity of CsPbBr<sub>3</sub> QWs during the heating process from 303 K to 393 K and the subsequent cooling process from 393 K to 303 K.

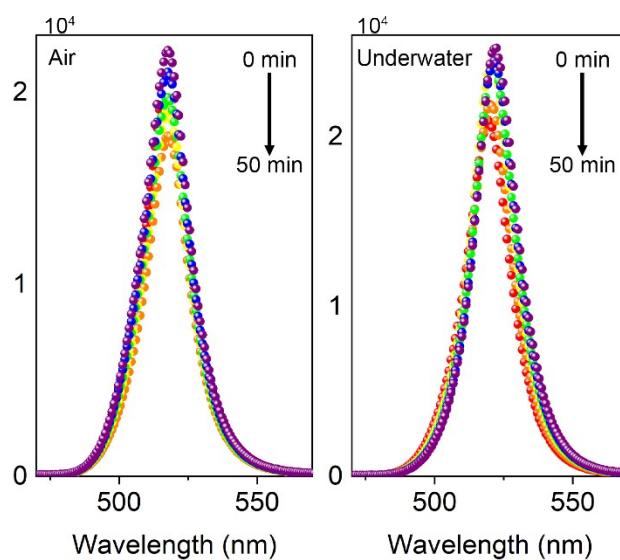

**Figure S7** The PL intensity of TFE-HF-QWs in air and water recorded from 0 minutes to 50 minutes.

Table S2 Communication performance of perovskites-based devices in previous literatures and this work

| Material                                          | Light source (nm) | PLQY   | Communication environment | Date rate | Ref       |
|---------------------------------------------------|-------------------|--------|---------------------------|-----------|-----------|
| CsPbBr <sub>1.8</sub> I <sub>1.2</sub> (solution) | LED (450)         | ~78%   | Air                       | 300 Mbps  | [1]       |
| CsPbBr <sub>3</sub> (thin film)                   | LD (375)          | ~73%   | Air                       | 34 Mbps   | [2]       |
| CsPbBr <sub>3</sub> (in glass)                    | LD (450)          | ~70%   | Water                     | 185 Mbps  | [3]       |
| CsPbBr <sub>3</sub> (in solution)                 | LD (440)          | ~70%   | Water                     | 40 Mbps   | [4]       |
| CsPbBr <sub>3</sub> :F (in colloids)              | LD (450)          | ~65.6% | Water                     | 60 Mbps   | This work |

References:

- [1] S. Mei, X. Liu, W. Zhang, R. Liu, L. Zheng, R. Guo, P. Tian, High-Bandwidth White-Light System Combining a Micro-LED with Perovskite Quantum Dots for Visible Light Communication, *ACS Appl. Mater. Interfaces* 2018, 10, 5641-5648.
- [2] C.H. Kang, I. Dursun, G. Liu, L. Sinatra, X. Sun, M. Kong, J. Pan, P. Maity, E.-N. Ooi, T.K. Ng, O.F. Mohammed, O.M. Bakr, B.S. Ooi, High-speed colour-converting photodetector with all-inorganic CsPbBr<sub>3</sub> perovskite nanocrystals for ultraviolet light communication, *Light Sci. Appl.* 2019, 8, 94.
- [3] M. Xia, S. Zhu, J. Luo, Y. Xu, P. Tian, G. Niu, J. Tang, Ultrastable Perovskite Nanocrystals in All - Inorganic Transparent Matrix for High - Speed Underwater Wireless Optical Communication, *Adv. Opt. Mater.* 2021, 9, 2002239.
- [4] X. Li, Z. Tong, W. Lyu, X. Chen, X. Yang, Y. Zhang, S. Liu, Y. Dai, Z. Zhang, C. Guo, J. Xu, Underwater quasi-omnidirectional wireless optical communication based on perovskite quantum dots, *Opt. Express* 2022, 30, 1709.
